# Supplementary material
Source: Springer Nature journal article supplement (https://www.springermedizin.de/resource/supplementary/12906_2011_478_MOESM5_ESM.pdf/9519612)

**A**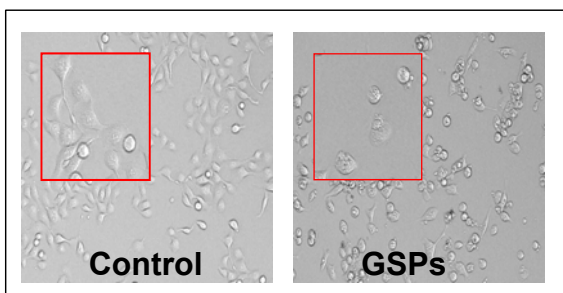**B**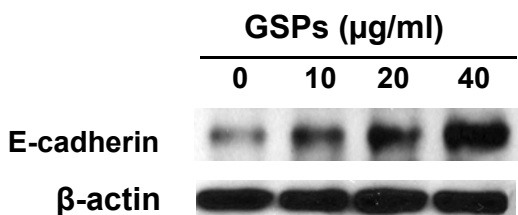**C**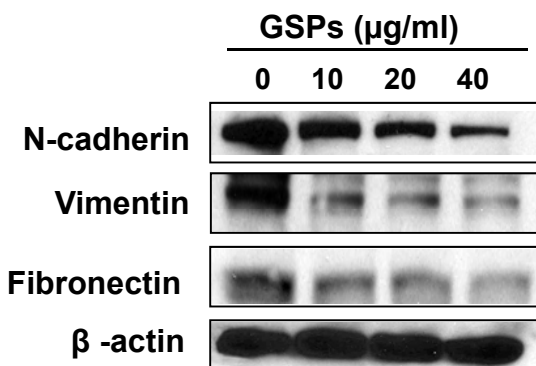**D**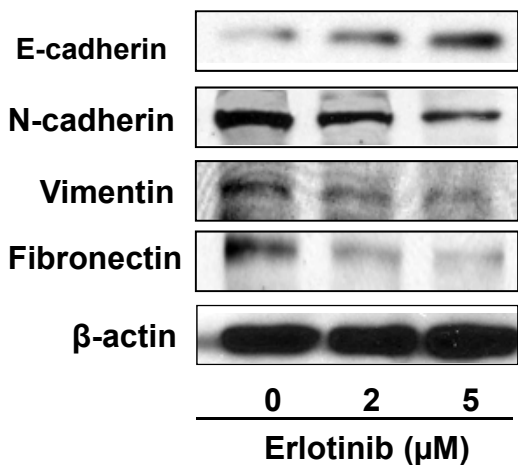

Supplement: MOESM5 [file 9519612]
